# Supplementary material for: Physical Chemistry Study of Collagen-Based Multilayer Films
Source: MDPI journal article supplement (doi:10.3390/gels9030192), 2023-03-02
Supplement: s1 [file s1]

# Physical Chemistry Study of Collagen-Based Multilayer Films

Yi-Wei Chen <sup>1</sup>, Muhammad Haseeb Iqbal <sup>1</sup>, Florent Meyer <sup>2,3</sup>, Vincent Ball <sup>2,3</sup> and Fouzia Boulmedais <sup>1,\*</sup>

<sup>1</sup> Institut Charles Sadron (UPR 22), Université de Strasbourg, CNRS, 67034 Strasbourg, France

<sup>2</sup> Centre de Recherche en Biomédecine de Strasbourg, Institut National de la Santé et de la Recherche Médicale, 67085 Strasbourg, France

<sup>3</sup> Université de Strasbourg, Faculté de Chirurgie Dentaire, 67000 Strasbourg, France

\* Correspondence: fouzia.boulmedais@ics-cnrs.unistra.fr

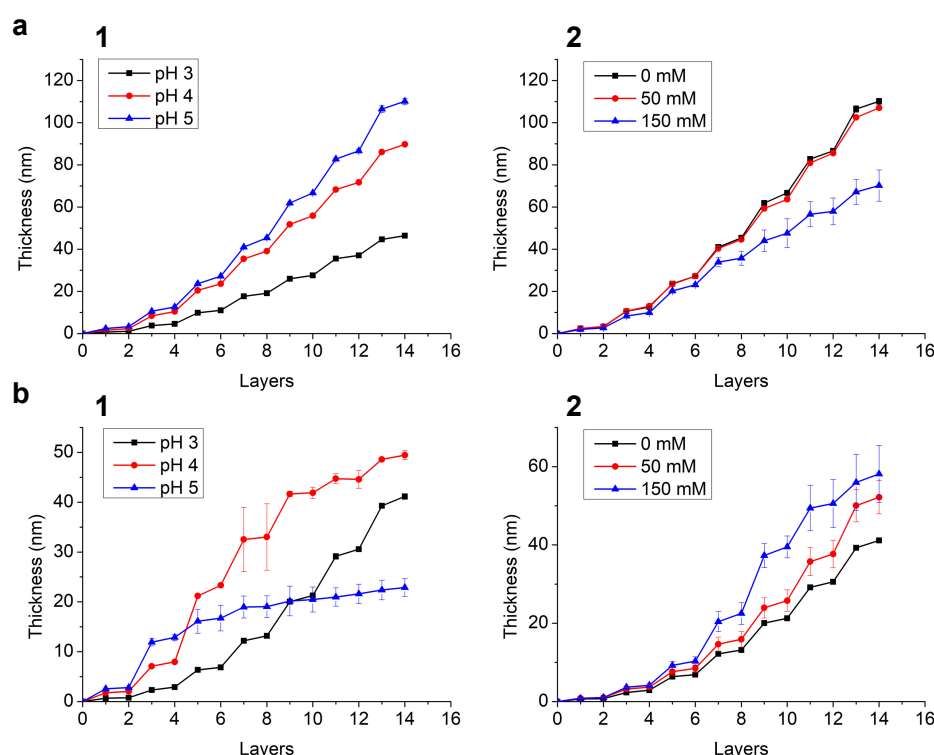

**Figure S1:** Buildup of COL/PSS films and COL/HEP films. Evolution of (a) (COL/PSS)<sub>7</sub> and (b) (COL/HEP)<sub>7</sub> films thickness measured by ellipsometry in triplicate in dry state built at (1) different pH and (2) different NaCl concentrations for (COL/PSS)<sub>7</sub> at pH 5 and (COL/HEP)<sub>7</sub> at pH 3 respectively with 20 min of dipping.

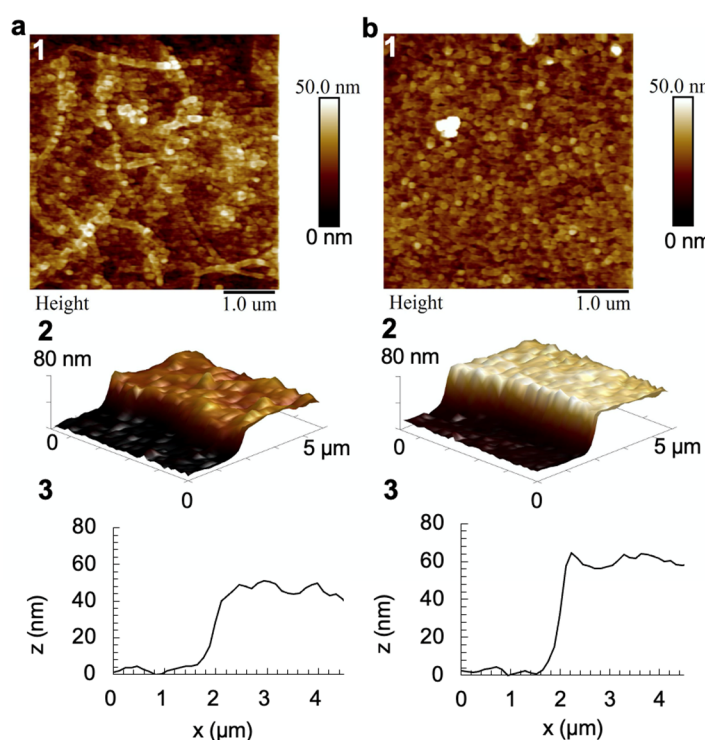

**Figure S2:** (a) (COL/PSS)<sub>4</sub> and (b) (COL/HEP)<sub>7</sub> films imaged by AFM in contact mode and dry state with their (1) surface topography, (2) AFM 3D images and (3) cross-section profile of scratched film in their respective pH buffer.

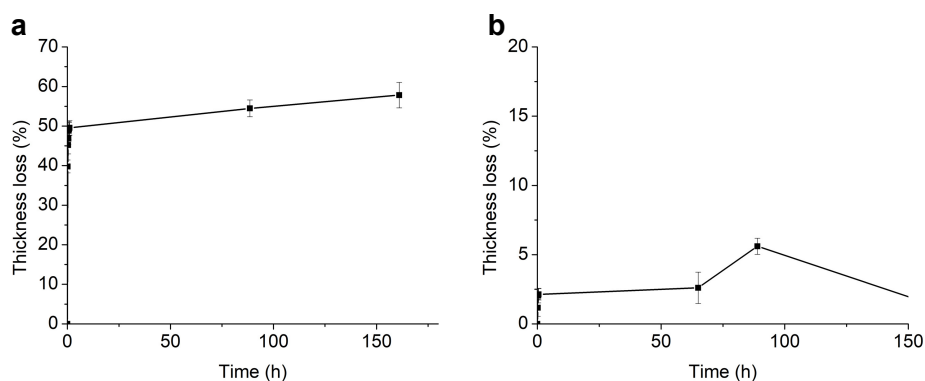

**Figure S3:** Thickness loss of dried (a) (COL/HEP)<sub>7</sub> and (b) (COL/PSS)<sub>7</sub> films on silicon in physiological solution measured by ellipsometry in the dry state.

**Table S1:** Films thickness of (COL/PSS)<sub>4</sub> and (COL/HEP)<sub>7</sub> measured by AFM and ellipsometry.

| Films                        | Thickness by ellipsometry (nm) <sup>a</sup> | Thickness by AFM (nm) <sup>b</sup> |
|------------------------------|---------------------------------------------|------------------------------------|
| Dried (COL/PSS) <sub>4</sub> | 45.4 ± 0.3                                  | 47.3 ± 5.5                         |
| Dried (COL/HEP) <sub>7</sub> | 52.2 ± 4.2                                  | 66.9 ± 2.3                         |

<sup>a</sup>average value of at least three different samples. <sup>b</sup>average value over one area in one sample.
